# Supplementary material for: ENO1-Mediated Deoxycytidine Synthesis and Gemcitabine Resistance by Stabilizing RRM2 in Pancreatic Cancer
Source: Research Square preprint supplement (doi:10.21203/rs.3.rs-6058602/v1), 2025-03-27
Supplement: Supplementary file 1 [file 0b014d91073683323bca1411.docx]

Table S1 1 Relationship between ENO1 and clinical baseline characteristics of PC patients(chi-square test))

| Variable | ENO1 low | ENO1 high | P value |
| --- | --- | --- | --- |
| Age |  |  | 0.077 |
| ≤60y | 27 | 33 |  |
| >60y | 37 | 27 |  |
| Gender  （M/F） | 31/33 | 28/32 | 0.50 |
| CA199(IU) |  |  | 0.016 |
| ≤100 | 48 | 33 |  |
| ＞100 | 16 | 27 |  |
| Tumor location |  |  | 0.575 |
| Head | 47 | 46 |  |
| Body and tail | 17 | 14 |  |
| Tumor size |  |  | <0.01 |
| ≤2cm | 55 | 35 |  |
| ＞2cm | 9 | 25 |  |
| N stage |  |  | <0.01 |
| N0 | 51 | 25 |  |
| N1 | 10 | 25 |  |
| N2 | 3 | 10 |  |
| neural invasion |  |  | 0.072 |
| yes | 46 | 50 |  |
| NO | 18 | 10 |  |
| Pv invasion |  |  | 0.062 |
| YES | 20 | 29 |  |
| NO | 44 | 31 |  |
| tumor differentiation |  |  | 0.050 |
| high | 15 | 7 |  |
| middle | 21 | 18 |  |
| low | 28 | 35 |  |
| AJCC stage |  |  | <0.001 |
| I | 51 | 23 |  |
| II | 10 | 26 |  |
| III | 3 | 11 |  |
| GEM treatment |  |  | 0.823 |
| YES | 52 | 48 |  |
| NO | 12 | 12 |  |

Table S2 Univariate and multivariate COX risk regression model analysis for OS and RFS

| Variable | OS | | | |  |
| --- | --- | --- | --- | --- | --- |
| univariate analysis | | multivariate analysis | |  |
| HR(95%CI) | Pvalue | HR(95%CI) | P value |  |
| Age（y）  ＜60 VS ≥60 | 0.99（0.63-1.58） | 0.99 |  |  |  |
| Gender  Male vs female | 1.31（0.82-2.87） | 0.25 |  |  |  |
| CA199(IU)  100 vs ≥100 | 1.86（1.15-2.99） | 0.01 | 1.09(0.64-1.85) | 0.75 |  |
| Tumor location  Head VS Body and tail | 1.58（0.91-2.76） | 0.11 |  |  |  |
| Tumor size(cm)  ＜2 VS ≥2 | 1.65（1.28-2.13） | 0.01 | 1.65(0.79-1.62) | 0.49 |  |
| lymph node metastasis  NO VS YES | 2.63（1.65-4.18） | <0.01 | 2.12(1.13-3.98) | 0.02 |  |
| neural invasion  NO VS YES | 1.76（0.92-3.36） | 0.09 |  |  |  |
| Pv invasion  NO VS YES | 2.62(1.65-4.17) | <0.01 | 2.11(1.20-3.72) | 0.01 |  |
| tumor differentiation  High VS middle&low | 2.67（1.67-4.37） | <0.01 | 2.28(1.36-3.84) | <0.01 |  |
| ENO1 expresion  Low VS High | 2.05(1.29-3.27) | <0.01 | 1.45(0.89-2.38) | 0.14 |  |

| Variable |  | DFS | | | |
| --- | --- | --- | --- | --- | --- |
|  | univariate analysis | | multivariate analysis | |
|  | HR(95%CI) | P value | HR(95%CI) | P value |
| Age（y）  ＜60 VS ≥60 |  | 1.38(0.91-2.07) | 0.12 |  |  |
| Gender  Male vs female |  | 0.99(0.66-1.49) | 0.95 |  |  |
| CA199(IU)  100 vs ≥100 |  | 1.83(1.19-2.81) | <0.01 | 1.06(0.66-1.69) | 0.82 |
| Tumor location  Head VS Body and tail |  | 1.45(0.90-2.34) | 0.13 |  |  |
| Tumor size(cm)  ＜2 VS ≥2 |  | 2.25(1.44-3.50） | <0.01 | 0.69(0.36-1.31) | 0.25 |
| lymph node metastasis  NO VS YES |  | 2.80(1.84-4.23) | <0.01 | 1.79(0.99-3.25) | 0.06 |
| neural invasion  NO VS YES |  | 1.71(1.01-2.91） | 0.047 | 1.03(0.56-1.89) | 0.93 |
| Pv invasion  NO VS YES |  | 2.7（1.76-4.13） | <0.01 | 1.87(1.07-3.29) | 0.03 |
| tumor differentiation  High VS middle&low |  | 2.4（1.73-3.31） | <0.01 | 2.04(1.31-3.18) | <0.01 |
| ENO1 expresion  Low VS High |  | 2.26(1.50-3.41) | <0.01 | 1.91(1.2-3.06) | <0.01 |

Table S3 Multivariate logistic regression model analysis for gemcitabine resistance in pancreatic cancer patients.

| Variable | gemcitabine resistance | | | |  |
| --- | --- | --- | --- | --- | --- |
| univariate analysis | | multivariate analysis | |  |
| OR(95%CI) | Pvalue | OR(95%CI) | Pvalue |  |
| Age（y）  ＜60 VS ≥60 | 1.04（0.5-2.18） | 0.91 |  |  |  |
| Gender  Male vs female | 1.53 (0.73-3.21） | 0.25 |  |  |  |
| CA199(IU)  100 vs ≥100 | 2.81（1.3-6.09） | 0.01 | 1.69(0.66-4.28) | 0.27 |  |
| Tumor location  Head VS Body and tail | 2.05（0.83-5.03） | 0.12 |  |  |  |
| Tumor size(cm)  ＜2 VS ≥2 | 2.33（1.04-5.24） | 0.04 | 0.46(0.13-1.68) | 0.24 |  |
| lymph node metastasis  NO VS YES | 3.81(1.75-8.27) | <0.01 | 2.22(0.71-6.92) | 0.17 |  |
| neural invasion  NO VS YES | 2.25(0.83-6.10) | 0.09 |  |  |  |
| Pv invasion  NO VS YES | 2.64(1.24-5.64) | 0.01 | 1.93(0.69-5.42) | 0.21 |  |
| tumor differentiation  High VS middle&low | 2.25（1.06-4.80） | 0.03 | 1.60(0.67-3.81) | 0.29 |  |
| ENO1 expresion  Low VS High | 6.6(2.88-15.14) | <0.01 | 6.6(2.88-15.14) | <0.01 |  |
